# Supplementary material for: Convergent evolution links molybdenum insertase domains with organism-specific sequences
Source: PubMed Central journal article supplement (PMC11489736; doi:10.1038/s42003-024-07073-w), 2024-10-18
Supplement: 42003_2024_7073_MOESM1_ESM.pdf [file 42003_2024_7073_MOESM1_ESM.pdf]

## Supplementary Figures

**a**

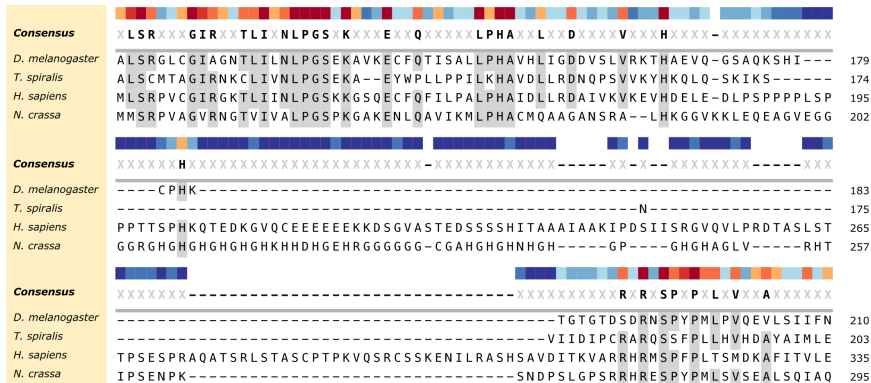

**b**

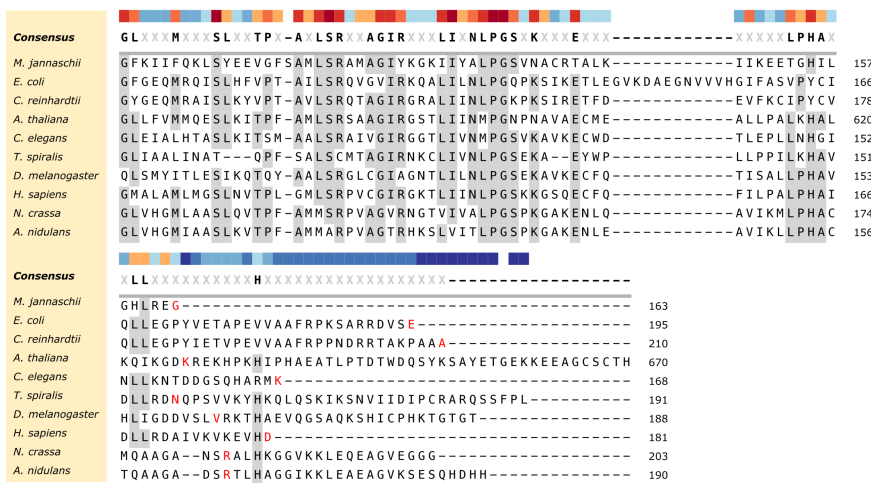

**c**

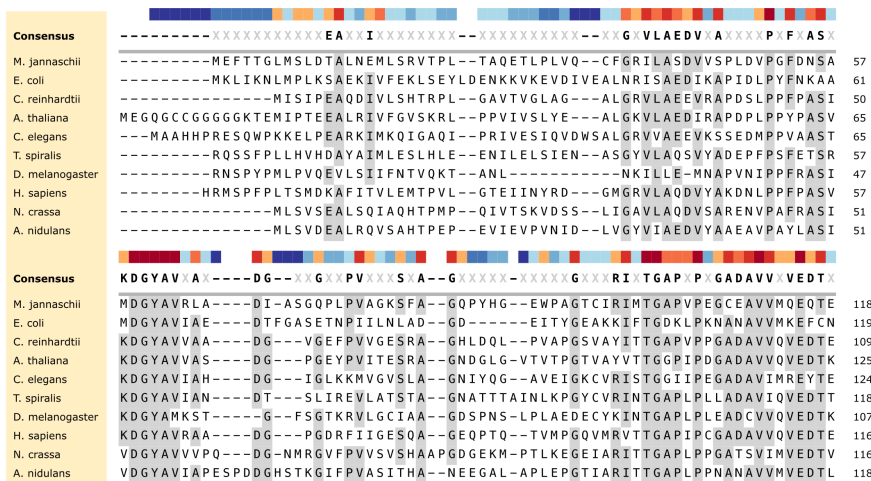

**Supplementary Figure 1 | Comparative analysis of Mo insertase domain boundaries. a** Alignment of full-length Mo insertase protein with both domains, the linkage region across animal and fungal Mo insertases are shown. **b** Alignment of the G domain proteins, C-terminal region is shown. The domain borders of the estimated G domain are highlighted in red. **c** Alignment of E domain proteins, N-terminal region bordering the E domain is shown. Multiple sequence alignment was performed using MAFFT. Sequence conservation is depicted using a color gradient from blue (lowest) to red (highest), with gray highlights indicating conserved residues.

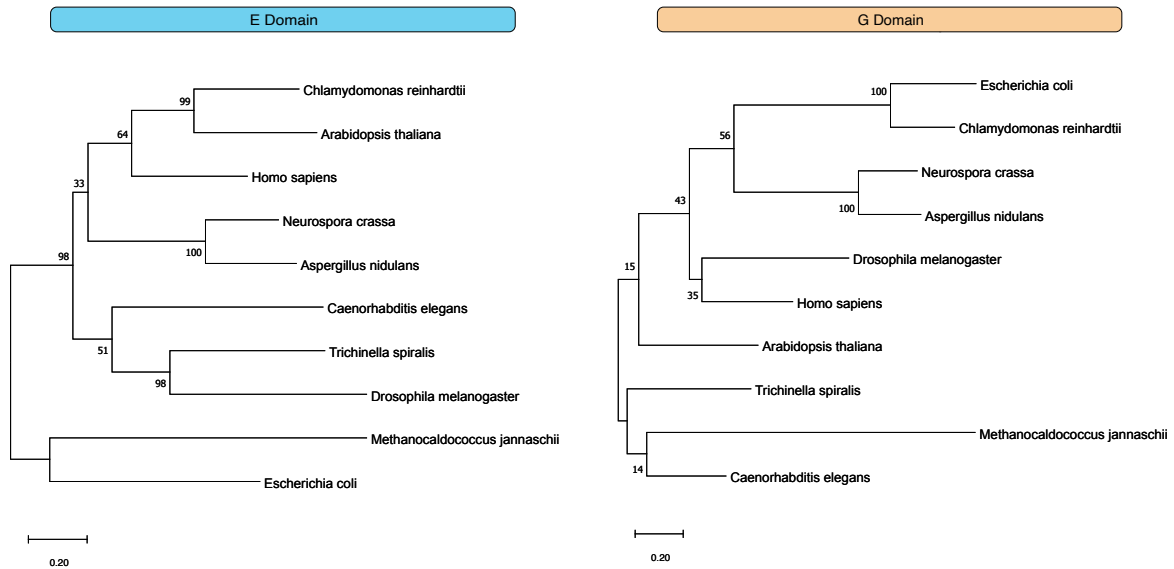

**Supplementary Figure 2 | Phylogenetic analysis of Mo insertase domains by Maximum Likelihood method.**

The evolutionary history was inferred by using the Maximum Likelihood method and JTT matrix-based model. Both trees with the highest log likelihood (-9455.98 E domain, -4001.28 G domain) are shown. The percentage of trees in which the associated taxa clustered together is shown next to the branches. Initial trees for the heuristic search were obtained automatically by applying Neighbor-Join and BioNJ algorithms to a matrix of pairwise distances estimated using the JTT model, and then selecting the topology with superior log likelihood value. The tree is drawn to scale, with branch lengths measured in the number of substitutions per site. This analysis involved 10 amino acid sequences. There were a total of 549 positions in the final dataset. Evolutionary analyses were conducted in MEGA11.

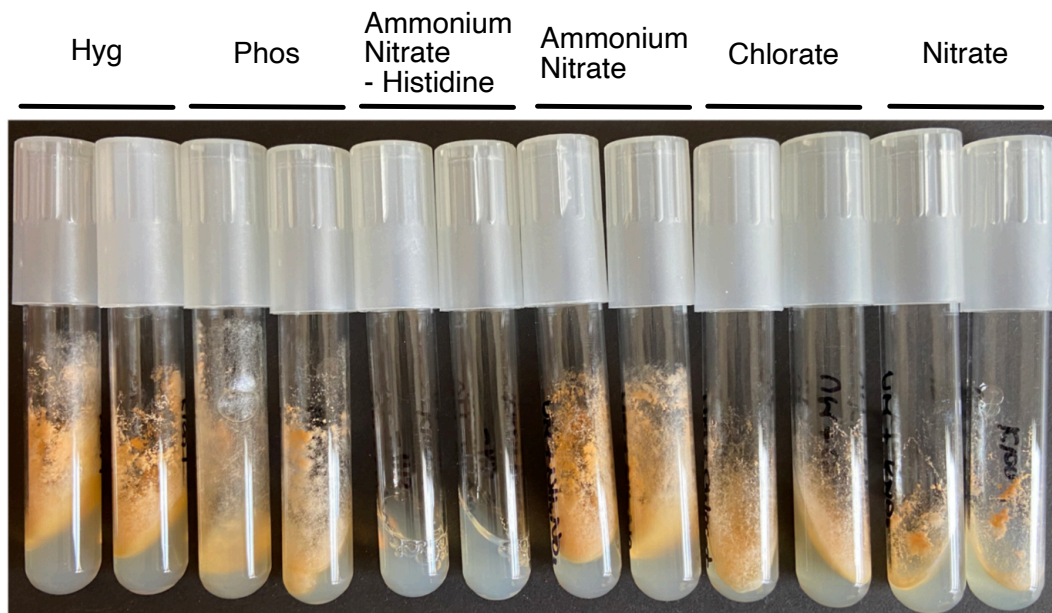

**Supplementary Figure 3 | Genotyping of  $\Delta nit-9$ ;  $his-3^-$  strain under various growth conditions.** The  $\Delta nit-9$ ;  $his-3^-$  strain was generated by crossing  $his-3^- mus52::bar mat A$  (FGSC988) with  $NCU09746::hph mus52::bar mat a$  (FGSC18574), resulting in a novel strain harboring both a  $his-3$  cassette for subsequent transformation and a knock-out in the  $nit-9$  gene. Verification was performed using different growth media, including hygromycin (hyg), phosphinothricin (Phos), ammonium nitrate, chlorate, and nitrate media, with or without histidine supplementation.

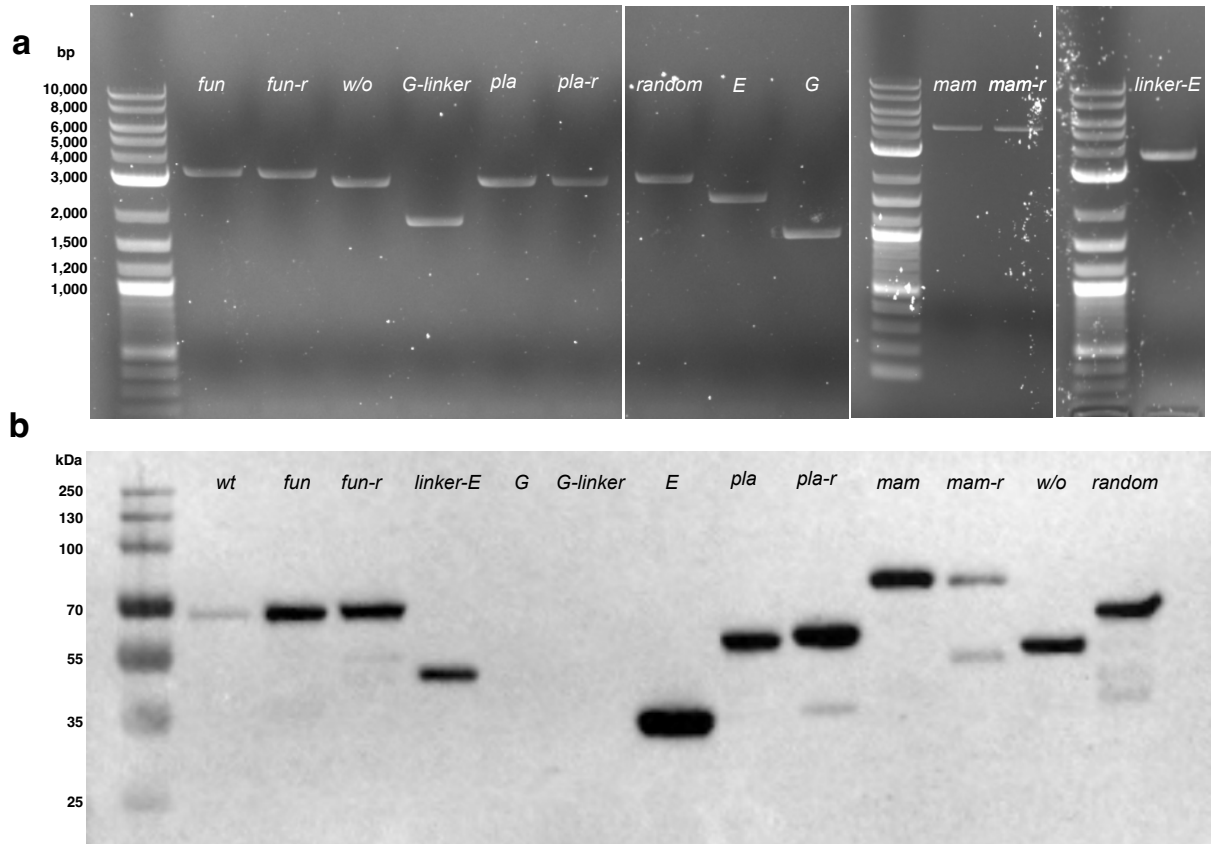

**Supplementary Figure 4 | Validation of NIT-9 construct integration at the *his-3* locus. a** Gel electrophoresis (1% agarose) was used to confirm transformants by PCR and verify the target gene. Subsequently, the bands were excised and sequenced via Sanger sequencing. **b** Western Blot to confirm protein expression of the expressed constructs. Each lane was loaded with 50  $\mu$ g of *N. crassa* crude extract. The wild-type (*wt*) and *nit-9* *N. crassa* strains are shown. Detection of the NIT-9E domain was achieved using a specific  $\alpha$ -NIT-9E antibody. Size was determined using PageRuler Plus Prestained (Cat. #26620 Thermo Scientific Waltham, USA). Abbreviations: fun = fungal, fun-r = fungal reverse, w/o = without linkage region, linker-E, G-linker, pla = plant, pla-r = plant reverse, mam = mammalian, mam-r = mammalian reverse, random, E = E domain, G = G domain.

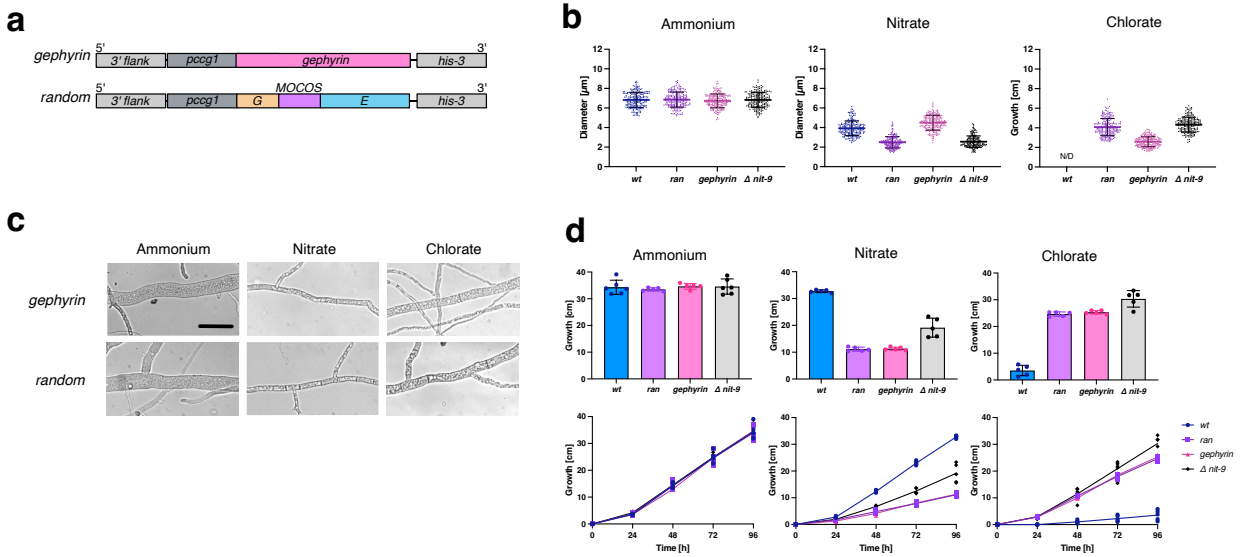

**Supplementary Figure 5 | Gephyrin and random sequence linkage fails to recover  $\Delta nit-9$ .** **a** Abbreviated schematic of NIT-9 variants expressed by the *ccg1* promoter in the *his-3* locus of an *N. crassa nit-9* knock-out strain. Strain names: *random* = NIT-9 linked by the 81 amino acid linkage sequence of MOCOS (Q96EN8) from *H. sapiens*. *gephyrin* = Gephyrin isoform X2 (Q9NQX3) from *H. sapiens*. **b** Diameter of *N. crassa* main hyphae was measured after 24 h of growth on Vogel's medium (MM) agar plates ( $n = 200$ , mean  $\pm$  SD, \* $P < 0.001$ ). **c** Hyphae of *N. crassa*, analyzed using bright-field microscopy, bar indicates 10  $\mu\text{m}$ . **d** Race tubes were grown at 30°C in the darkness; the tubes were marked every 24 h. Growth was measured over 96 h. Experiments were performed in six independent replicates ( $n = 5-6$ , mean  $\pm$  SD, \* $P < 0.01$ , One-way ANOVA). (B-D) All fungi were cultivated with either 80 mM ammonium or 80 mM nitrate as the sole nitrogen source; for samples with 300 mM chlorate, 25 mM ammonium nitrate was used as a nitrogen source. *wt* = wild-type strain 74-OR23-1 V.  $\Delta nit-9$  = *nit-9* knock-out strain.

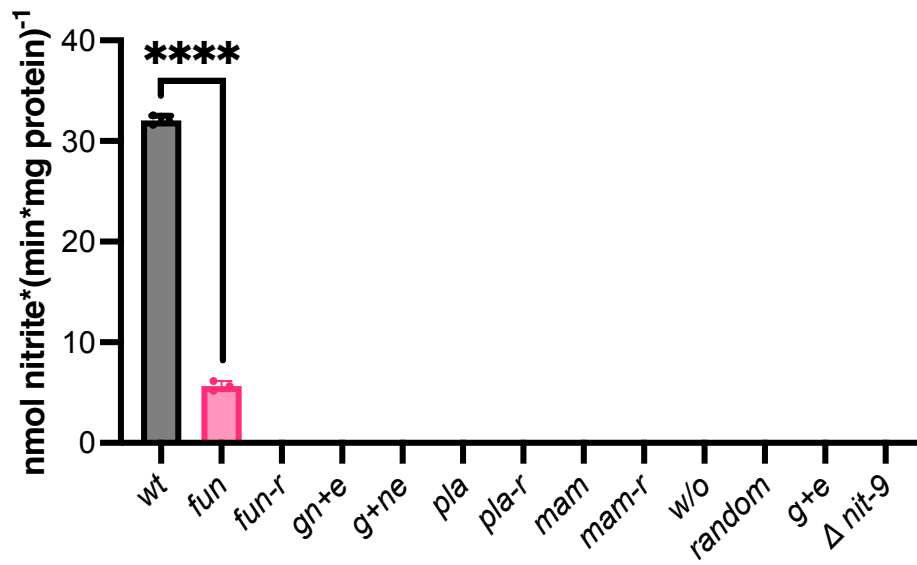

**Supplementary Figure 6 | Nitrate reductase activity of strains measured in this study.** Nitrate reductase activity in *N. crassa* crude extracts. Strains were grown for 16 h in liquid Vogel's minimal medium (MM) with 80 mM ammonium and subsequently transferred into liquid MM with 80 mM nitrate for 3 h. Experiments were performed in independent triplicates, where each replicate comprised the mean of three technical replicates (n = 3, Mean, Tukey, \*P < 0.001, One-way ANOVA). N/D = non-detectable activity.

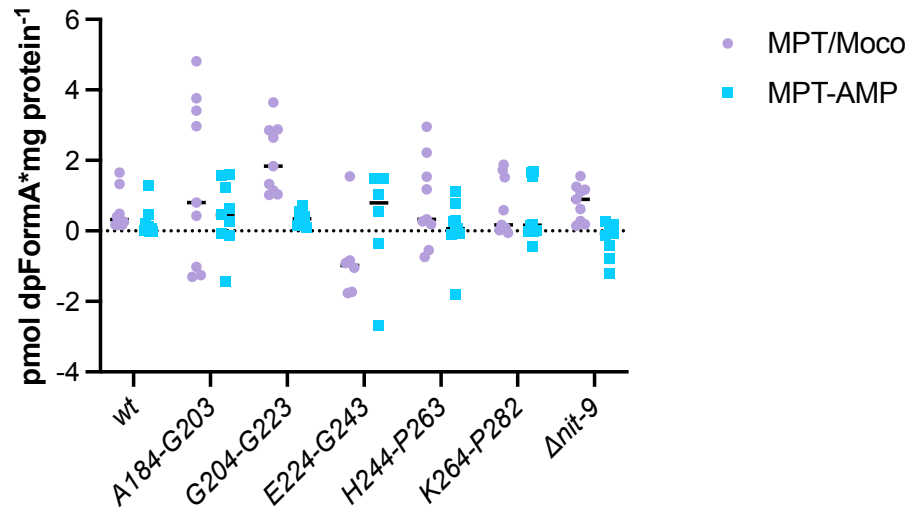

**Supplementary Figure 7 | Quantification of MPT-AMP and Moco/MPT content in crude extract from *N. crassa*.** Strains were grown for 16 h in liquid Vogel's minimal medium (MM) containing 80 mM ammonium, followed by a 3 h incubation in MM with 80 mM nitrate to induce nitrate assimilation. MPT/Moco and MPT-AMP were oxidized to dephospho-FormA (dpFormA) in an acidic iodine environment, followed by treatment with alkaline phosphatase and phosphodiesterase (MPT-AMP). The dpFormA content, measured via HPLC, is shown as pmol per mg of total protein for the truncation strains, *wt*, and the  $\Delta nit-9$  mutant. For MPT-AMP values, MPT/Moco was previously subtracted from the resulting MPT-AMP signal.

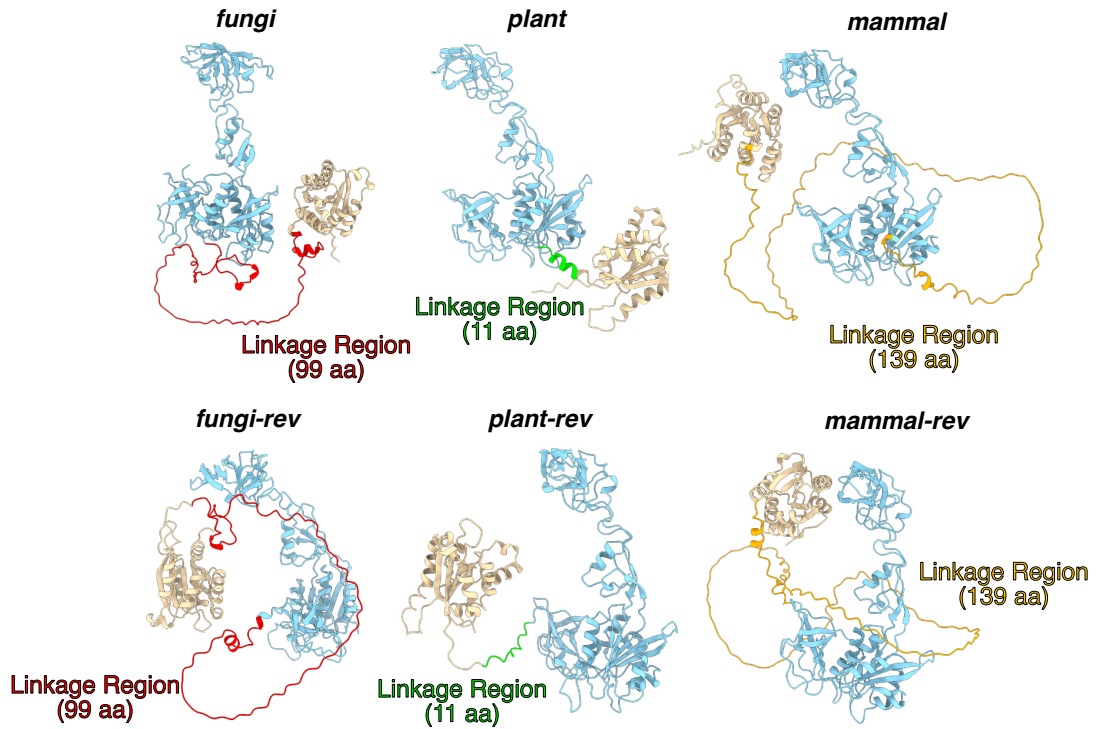

**Supplementary Figure 8 | Mo insertase linkage region results in unstructured sequence.** AlphaFold 3 models of NIT-9 E and G domain linked with the convergently developed linkage sequences in both orientations as used in growth analysis. The NIT-9E domain is shown in sky blue, the NIT-9G domain in beige, the fungal linkage region from *N. crassa* in red, the plant linkage region from *A. thaliana* in green, and the mammalian linkage region from *H. sapiens* in orange.



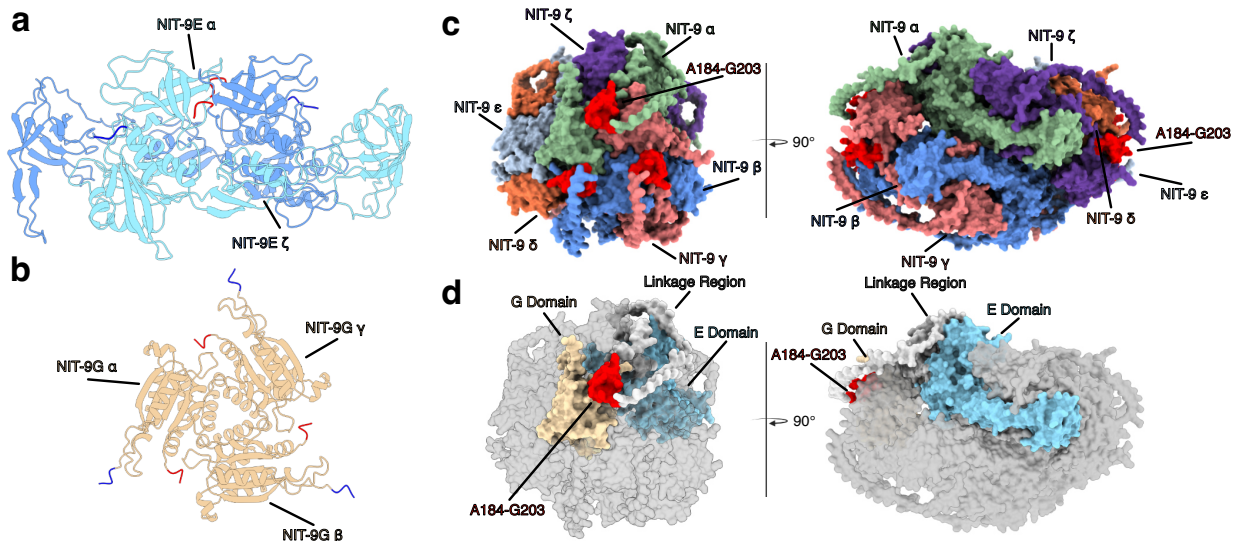

**Supplementary Figure 9 | NIT-9 hexameric complex structure is based on G domain trimer and E domain dimer. a, b** NIT-9E domain dimer and NIT-9G trimer modeled with AlphaFold 3 superimposed to CNX1E (PDB: 6Q32) and CNX1G (PDB: 1UUX), respectively. The N-terminus is highlighted in blue, and the C-terminus in red. **c,d** AlphaFold 3 models of NIT-9 hexamer. **c** NIT-9 protein complex colored according to protein chains. NIT-9  $\alpha$  green, NIT-9  $\beta$  blue, NIT-9  $\gamma$  salmon, NIT-9  $\delta$  orange, NIT-9  $\epsilon$  light blue, NIT-9  $\zeta$  purple, and A184-G203 in red. **d** One NIT-9 chain is shown in color within the complex, colored according to protein domain. NIT-9E sky blue, NIT-9G beige, the unstructured linkage region in gray, and A184-G203 in red. One NIT-9 chain is shown in color within the complex.

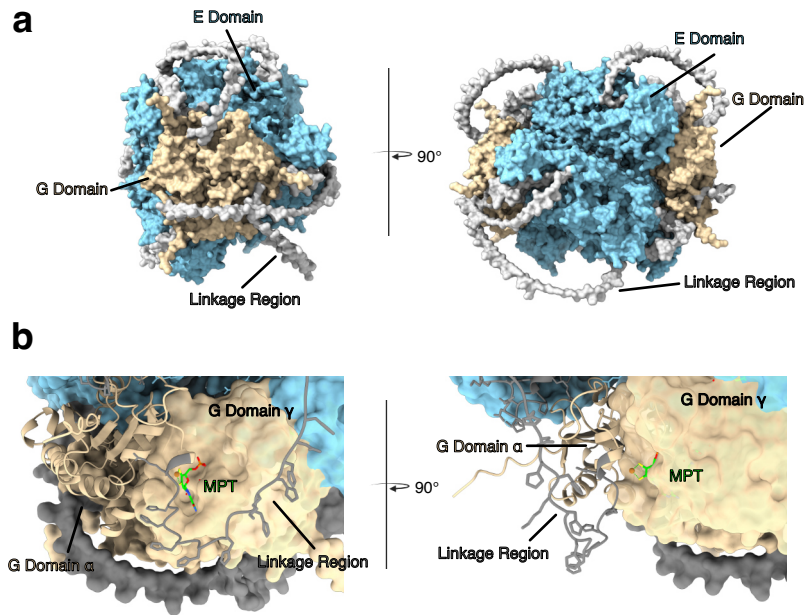

**Supplementary Figure 10 | NIT-9 hexamer modelled without A184-G203.** **a** AlphaFold 3 generated protein structure of native NIT-9 hexamer without residues A184-G203. The E domain is depicted in sky blue, the G domain in beige, and the unstructured linkage region in gray. **b** Interface of two G domains in proximity with the linkage region. G domain  $\gamma$  was superimposed (PDB: 1UUX) to reveal the binding position of MPT.

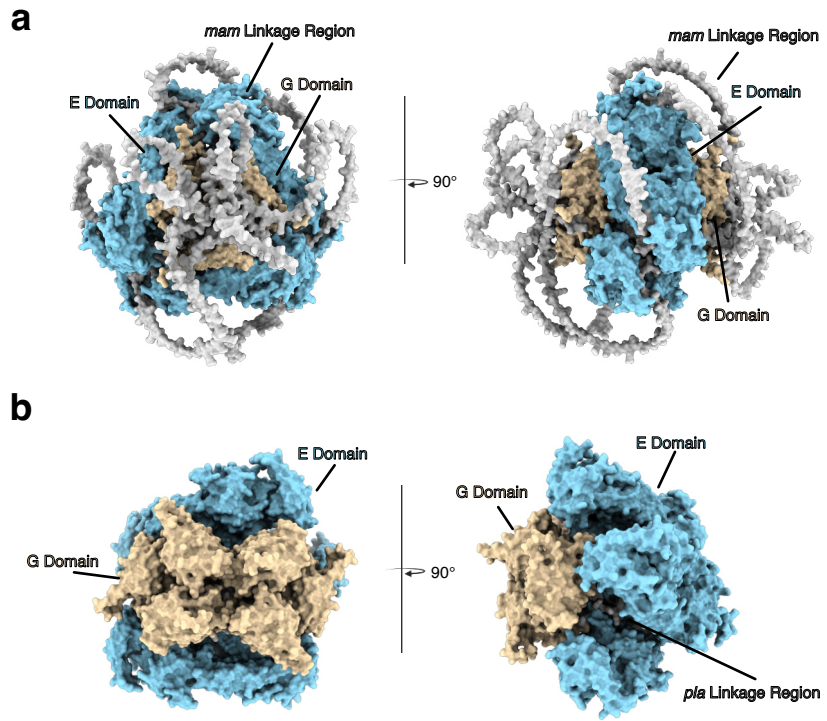

**Supplementary Figure 11 | Structural model of NIT-9 hexamers with mammal and plant linkage regions.**

AlphaFold 3 generated protein structure of NIT-9 variants with convergently evolved linkage sequences, forming hexamers. The E domain is depicted in sky blue, the G domain in beige, and the unstructured linkage region in gray.

**a** mammal linkage sequence. **b** plant linkage sequence.

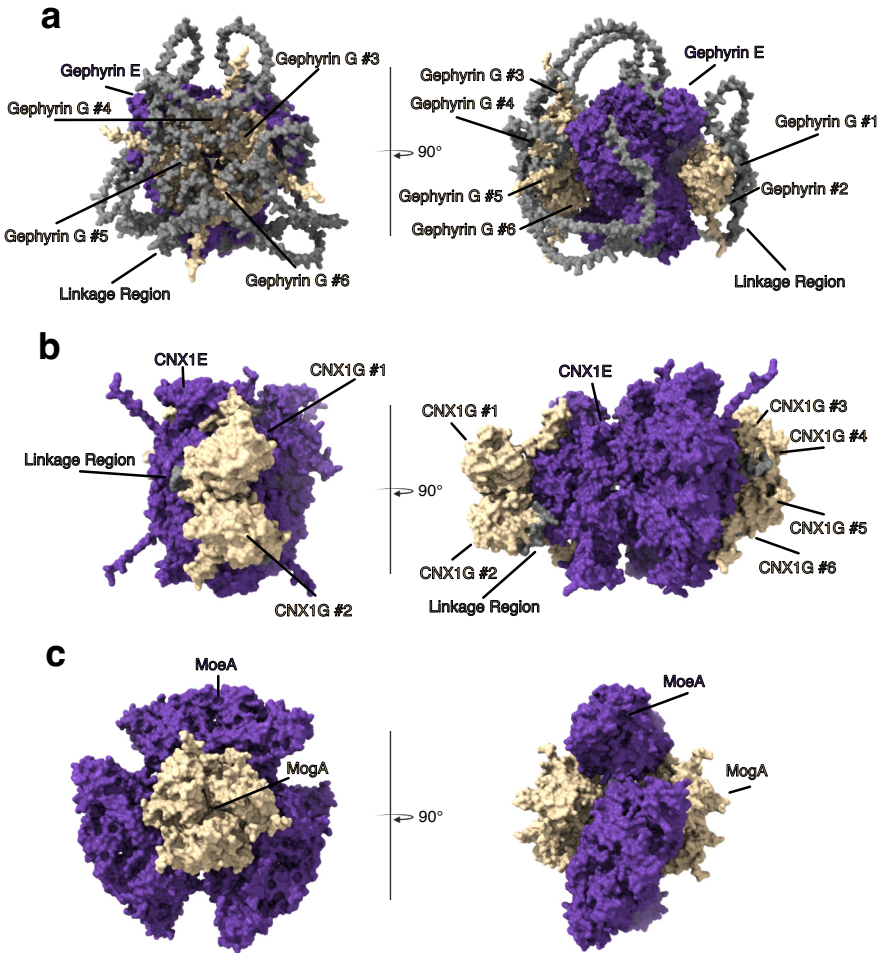

**Supplementary Figure 12 | Structural model of Mo insertase hexamers from mammals, plants, and bacteria.**

AlphaFold 3 generated protein structures of Mo insertase hexamers. The E domain is depicted in purple, the G domain in beige, and the unstructured linkage region in gray. **a** gephyrin from *H. sapiens* (AAF81785.1). **b** CNX1 from *A. thaliana* (NP\_197599.1). **c** MogA and MoeA from *E. coli* (NP\_414550.1, CAD6018316.1).

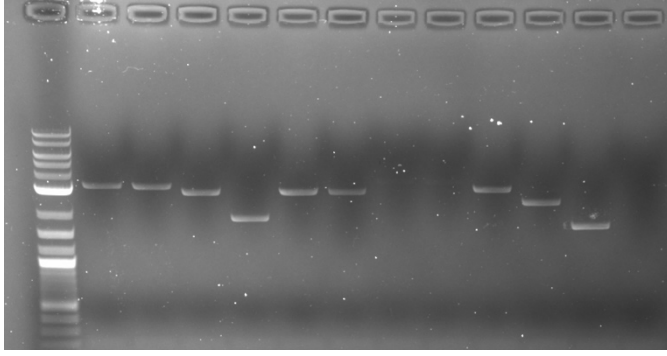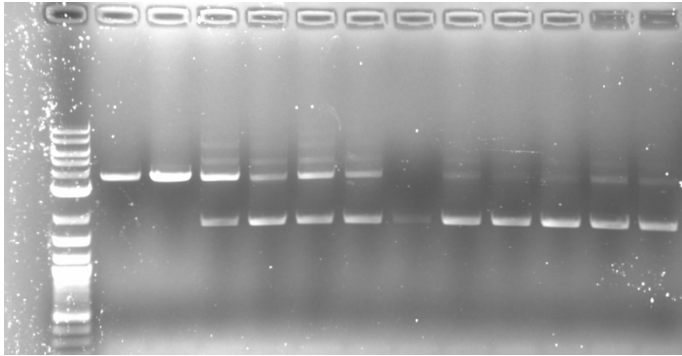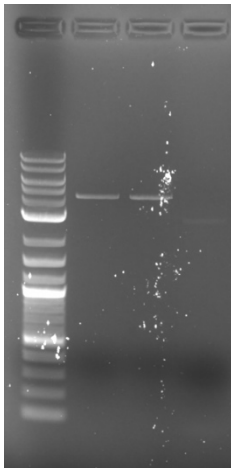

**Supplementary Figure 13 | Uncropped Agarose gels of NIT-9 constructs.** Gel electrophoresis (1% agarose) was used to confirm transformants by PCR and verify the target gene. Subsequently, the bands were excised and sequenced via Sanger sequencing. The NEB 1kb + ladder (Cat. #N3200S New England Biolabs Ipswich, USA) was used as reference.

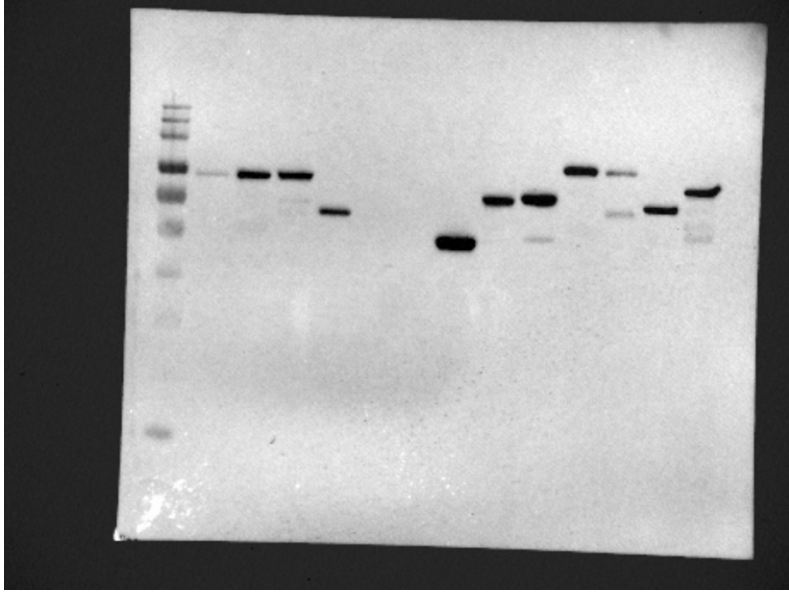

**Supplementary Figure 14 | Uncropped Western Blot of NIT-9 constructs.** Western Blot to confirm protein expression of the expressed constructs. Each lane was loaded with 50  $\mu\text{g}$  of *N. crassa* crude extract. The wild-type (*wt*) and *nit-9* *N. crassa* strains are shown. Detection of the NIT-9E domain was achieved using a specific  $\alpha$ -NIT-9E antibody. Size was determined using PageRuler Plus Prestained (Cat. #26620 Thermo Scientific Waltham, USA).

## Supplementary Tables

Supplementary Table 1 | Strains used in this study.

| Strain ID                                              | Other ID | Mat   | Genotype                                                                          | Construction strategy              | Reference (Source) |
|--------------------------------------------------------|----------|-------|-----------------------------------------------------------------------------------|------------------------------------|--------------------|
| <i>wt</i>                                              | #2489    | mat A | 74-OR23-1 VA                                                                      | -                                  | FGSC               |
| $\Delta$ <i>nit-9</i>                                  | #18574   | mat a | <i>nit-9::hph; mus52::bar</i>                                                     | -                                  | FGSC               |
| <i>his-3-</i>                                          | #988     | mat A | <i>his-3-; mus52::bar</i>                                                         | -                                  | FGSC               |
| $\Delta$ <i>nit-9</i> ;<br><i>his-3-</i><br><i>fun</i> | K1-57    | mat A | <i>his-3-; mus52::bar, nit-9::hph; mus 52::bar</i>                                | crossing                           | this study         |
|                                                        | K1-67    | mat A | <i>his-3+::pccg-1::nit-9; nit-9::hph; mus52::bar</i>                              | Trafo, integration<br><i>his-3</i> | this study         |
| <i>fun-r</i>                                           | K1-68    | mat A | <i>his-3+::pccg-1::nit-9E::nit-9C::nit-9G; nit-9::hph; mus52::bar</i>             | Trafo, integration<br><i>his-3</i> | this study         |
| <i>pla</i>                                             | K1-72    | mat A | <i>his-3+::pccg-1::nit-9G::cnx1-linker::nit-9E; nit-9::hph; mus52::bar</i>        | Trafo, integration<br><i>his-3</i> | this study         |
| <i>pla-r</i>                                           | K1-73    | mat A | <i>his-3+::pccg-1::nit-9E::cnx1-linker::nit-9G; nit-9::hph; mus52::bar</i>        | Trafo, integration<br><i>his-3</i> | this study         |
| <i>mam</i>                                             | K1-74    | mat A | <i>his-3+::pccg-1::nit-9G::gephyrin-linker::nit-9E; nit-9::hph; mus52::bar</i>    | Trafo, integration<br><i>his-3</i> | this study         |
| <i>mam-r</i>                                           | K1-75    | mat A | <i>his-3+::pccg-1::nit-9E::gephyrin-linker::nit-9G; nit-9::hph; mus52::bar</i>    | Trafo, integration<br><i>his-3</i> | this study         |
| <i>w/o</i>                                             | K1-69    | mat A | <i>his-3+::pccg-1::nit-9G::nit-9E; nit-9::hph; mus52::bar</i>                     | Trafo, integration<br><i>his-3</i> | this study         |
| <b>G domain</b>                                        | K1-77    | mat A | <i>his-3+::pccg-1::nit-9G; nit-9::hph; mus52::bar</i>                             | Trafo, integration<br><i>his-3</i> | this study         |
| <b>E domain</b>                                        | K1-78    | mat A | <i>his-3+::pccg-1::nit-9E; nit-9::hph; mus52::bar</i>                             | Trafo, integration<br><i>his-3</i> | this study         |
| <b>G-linker</b>                                        | K1-71    | mat A | <i>his-3+::pccg-1::nit-9G::nit-9C; nit-9::hph; mus52::bar</i>                     | Trafo, integration<br><i>his-3</i> | this study         |
| <b>linker-E</b>                                        | K1-70    | mat A | <i>his-3+::pccg-1::nit-9C::nit-9E; nit-9::hph; mus52::bar</i>                     | Trafo, integration<br><i>his-3</i> | this study         |
| <b>A184-G203</b>                                       | K1-79    | mat A | <i>his-3+::pccg-1::nit-9<math>\Delta</math>A184-G203 ; nit-9::hph; mus52::bar</i> | Trafo, integration<br><i>his-3</i> | this study         |
| <b>G204-G223</b>                                       | K1-80    | mat A | <i>his-3+::pccg-1::nit-9<math>\Delta</math>G204-G223 ; nit-9::hph; mus52::bar</i> | Trafo, integration<br><i>his-3</i> | this study         |
| <b>E224-G243</b>                                       | K1-81    | mat A | <i>his-3+::pccg-1::nit-9<math>\Delta</math>E224-G243 ; nit-9::hph; mus52::bar</i> | Trafo, integration<br><i>his-3</i> | this study         |
| <b>H244-P263</b>                                       | K1-82    | mat A | <i>his-3+::pccg-1::nit-9<math>\Delta</math>H244-P263 ; nit-9::hph; mus52::bar</i> | Trafo, integration<br><i>his-3</i> | this study         |
| <b>K264-P282</b>                                       | K1-83    | mat A | <i>his-3+::pccg-1::nit-9<math>\Delta</math>K264-P282 ; nit-9::hph; mus52::bar</i> | Trafo, integration<br><i>his-3</i> | this study         |
| <b>random</b>                                          | K1-76    | mat A | <i>his-3+::pccg-1::nit-9G::mocos-linker::nit-9E; nit-9::hph; mus52::bar</i>       | Trafo, integration<br><i>his-3</i> | this study         |
| <b>gephyrin</b>                                        | K1-84    | mat A | <i>his-3+::pccg-1::gephyrin; nit-9::hph; mus52::bar</i>                           | Trafo, integration<br><i>his-3</i> | this study         |

Supplementary Table 2 | Primers and plasmids used in this study.

| Construct | Name            | DNA # | Primer Name                        | Primer Sequence                            | Parental Vector | Cloning Method            |
|-----------|-----------------|-------|------------------------------------|--------------------------------------------|-----------------|---------------------------|
| 1         | <i>fun</i>      | D128  | F_NIT-9.FOR                        | GGTTAATTAACatgtctctcaagtactactccagcag      | PMF272          | NEBuilder                 |
|           |                 |       | F_NIT-9.REV                        | TCGAATTCTTAatcacatcgctgcgtaaacc            |                 |                           |
| 2         | <i>fun-r</i>    | D129  | F1_pCCG_NIT-9fl_reverse.FOR        | GGTTAATTAACatgtctctgtctccgaagc             | PMF272          | NEBuilder 4 fragments     |
|           |                 |       | F1_pCCG_NIT-9fl_reverse.REV        | ttatgtaaagcaatcacatcgctgcgtaaacc           |                 |                           |
|           |                 |       | F2_pCCG_NIT-9fl_reverse.FOR        | cgatgtgattgctttacataaggggggagtgagaaaa      |                 |                           |
|           |                 |       | F2_pCCG_NIT-9fl_reverse.REV        | tgaggacatcgggtaaggagactcgc                 |                 |                           |
|           |                 |       | F3_pCCG_NIT-9fl_reverse.REV        | TATCGAATTCTTAatctagagttagcaccagcagcc       |                 |                           |
|           |                 |       | F3_pCCG_NIT-9fl_reverse.FOR        | cttacccgatgctcctcaagtactactccagcag         |                 |                           |
|           |                 |       | V_pCCG_NIT-9fl_reverse.FOR         | gctaactctagaTAAGAATTCGATATCAAGCTTATCGATA   |                 |                           |
|           |                 |       | V_pCCG_NIT-9fl_reverse.REV         | CCGT<br>acagagagcatGTTAATTAACCCGGGGATCCACT |                 |                           |
| 3         | <i>w/o</i>      | D130  | pCCG_NIT-9_GE.FOR                  | ATGCTCTCTGTCTCCGAAG                        | D128            | Site-directed mutagenesis |
|           |                 |       | pCCG_NIT-9_GE.REV                  | TCTAGAGTTAGCACCAGC                         |                 |                           |
| 4         | <i>linker-E</i> | D131  | pCCG_Linkers_NIT-9E.FOR            | GCTTTACATAAGGGGGGAG                        | D128            | Site-directed mutagenesis |
|           |                 |       | pCCG_Linkers_NIT-9E.REV            | CATGTTAATTAACCCGGG                         |                 |                           |
| 5         | <i>G-linker</i> | D132  | pCCG_NIT-9G-Linker.FOR             | TAAGAATTCGATATCAAGCTTATCGATACC             | D128            | Site-directed mutagenesis |
|           |                 |       | pCCG_NIT-9G-Linker.REV             | CGGGTAAGGAGACTCGCG                         |                 |                           |
| 6         | <i>pla</i>      | D133  | pCCG_Ni9fl_CN1.FOR                 | gtacgatgaagtacctATGCTCTCTGTCTCCGAAG        | D128            | Site-directed mutagenesis |
|           |                 |       | pCCG_NIT-9fl_CN1.REV               | ttcttttcttcgaatTCTAGAGTTAGCACCAGC          |                 |                           |
| 7         | <i>pla-r</i>    | D134  | R_pCCG_NIT-9fl_CN1.FOR             | GTACGATGAAGTACCTATGTCCTCAAGTACTACTCC       | D128            | Site-directed mutagenesis |
|           |                 |       | R_pCCG_NIT-9fl_CN1.REV             | TTCTTTTCTTCCGAATAATCACATCGCTGCGTAAAC       |                 |                           |
| 8         | <i>mam</i>      | D135  | F_pCCG_NIT-9fl_Gephyrin-Linker.FOR | ctaactctagagaactgaagattgcttccccac          | D128            | NEBuilder                 |
|           |                 |       | F_pCCG_NIT-9fl_Gephyrin-Linker.REV | cagagagcattctctagccacctgggatatcg           |                 |                           |
|           |                 |       | V_pCCG_NIT-9fl_Gephyrin-Linker.FOR | gctagaagaatgctctctgtctccgaagc              |                 |                           |
|           |                 |       | V_pCCG_NIT-9fl_Gephyrin-Linker.REV | atctcaagttctctagagttagcaccagcagc           |                 |                           |
| 9         | <i>mam-r</i>    | D136  | RF_pCCG_NIT-9fl_Gephyrin.FOR       | cgatgtgattgaactgaagattgcttccccac           | PMF272          | NEBuilder                 |
|           |                 |       | RF_pCCG_NIT-9fl_Gephyrin.REV       | ttgaggacattctctagccacctgggatatcg           |                 |                           |
|           |                 |       | RV_pCCG_NIT-9fl_Gephyrin.FOR       | gctagaagaatgctctcaagtactactccagcag         |                 |                           |
|           |                 |       | RV_pCCG_NIT-9fl_Gephyrin.REV       | cttcaagttcaatcacatcgctgcgtaaacc            |                 |                           |
| 10        | <i>random</i>   | D137  | F_pCCG_NIT-9fl_Random.FOR          | actctagagactggcctgtccctcagg                | PMF272          | NEBuilder                 |
|           |                 |       | F_pCCG_NIT-9fl_Random.REV          | agagagcatcaggactcctgcagctttctct            |                 |                           |
|           |                 |       | V_pCCG_NIT-9fl_Random.FOR          | gagtcctgatgctctctgtctccgaagc               |                 |                           |
|           |                 |       | V_pCCG_NIT-9fl_Random.REV          | aggccagttctctagagttagcaccagcagc            |                 |                           |
| 11        | <i>E domain</i> | D156  | F_pCCG_C-Gly_3xFLAG_NIT-9E.FOR     | TCAACCAAAtgtctctgtctccgaagc                | PMF272          | NEBuilder                 |
|           |                 |       | F_pCCG_C-Gly_3xFLAG_NIT-9E.REV     | CCTCCGCCctaaatcacatcgctgcgtaaaccg          |                 |                           |



|    |                  |      |                                        |                                        |        |                           |
|----|------------------|------|----------------------------------------|----------------------------------------|--------|---------------------------|
|    |                  |      | V_pCCG_C-<br>Gly_3xFLAG_NIT-9<br>E.FOR | tgatttagGGCGGAGGCGGCGGA                |        |                           |
|    |                  |      | V_pCCG_C-<br>Gly_3xFLAG_NIT-9<br>E.REV | cagagagcaF24:K24GATGTGAGGGTTGTG        |        |                           |
| 12 | <i>G domain</i>  | D157 | pCCG_NIT-9E/G.FOR                      | TGATCCCGGGTGGCATCC                     | D128   | Site-directed mutagenesis |
|    |                  |      | pCCG_NIT-9G.REV                        | TCTAGAGTTAGCACCAGCAGC                  |        |                           |
| 13 | <i>A184-G203</i> | D164 | A184-G203.FOR                          | GGACGTGGACATGGTCAC                     | D128   | Site-directed mutagenesis |
|    |                  |      | A184-G203.REV                          | TCTAGAGTTAGCACCAGC                     |        |                           |
| 14 | <i>G204-G223</i> | D166 | G204-G223.FOR                          | GAGCACCGAGGAGGAGGA                     | D128   | Site-directed mutagenesis |
|    |                  |      | G204-G223.REV                          | ACCACCTCCTTCTACTCCC                    |        |                           |
| 15 | <i>E224-G243</i> | D167 | E224-G243.FOR                          | CACGGCCCAGGCCACGGC                     | D128   | Site-directed mutagenesis |
|    |                  |      | E224-G243.REV                          | GCCATGGTCGTGATGCTTGTGTCCATG            |        |                           |
| 16 | <i>H244-P263</i> | D168 | H244-P263.FOR                          | AAGTCCAACGATCCCAGC                     | D128   | Site-directed mutagenesis |
|    |                  |      | H244-P263.REV                          | ACCGTGGTTATGGCCATG                     |        |                           |
| 17 | <i>K264-P282</i> | D169 | K264-P282.FOR                          | ATGCTCTGTCTCCGAAG                      | D128   | Site-directed mutagenesis |
|    |                  |      | K264-P282.REV                          | GGGGTTTTTCAGAGGGGAT                    |        |                           |
| 18 | <i>Gephyrin</i>  | D177 | F_GEPH2.FOR                            | TTAATTAACATGGCGACCGAGGG                | PMF272 | NEBuilder                 |
|    |                  |      | F_GEPH2.REV                            | ATCGAATTCTCATAGCCGTCCAATGACCATGAC      |        |                           |
|    |                  |      | V_GEPH2.FOR                            | CGGCTATGAGAATTCGATATCAAGCTTATCGATACC   |        |                           |
|    |                  |      | V_GEPH2.REV                            | G<br>CGGTCGCCATGTTAATTAACCCGGGGATCCACT |        |                           |

Supplementary Table 3 | Accession numbers for Mo insertase genes.

| Organism name                        | Accession number |                | Mo Insertase name |          |
|--------------------------------------|------------------|----------------|-------------------|----------|
|                                      | G domain         | E domain       | G domain          | E domain |
| <i>Arabidopsis thaliana</i>          | NP_197599.1      |                | CNX1              |          |
| <i>Aspergillus nidulans</i>          | XP_661382.1      |                | CNXE              |          |
| <i>Caenorhabditis elegans</i>        | W01A11.6.1       | T06H11.4.1     | MOC-2             | MOC-1    |
| <i>Chlamydomonas reinhardtii</i>     | ABC42491.1       | ABC42492.1     | Cnx1G             | Cnx1E    |
| <i>Drosophila melanogaster</i>       | NP_477030.1      |                | Cinnamon          |          |
| <i>Escherichia coli</i>              | NP_414550.1      | CAD6018316.1   | MogA              | MoeA     |
| <i>Homo sapiens</i>                  | AAF81785.1       |                | Gephyrin          |          |
| <i>Methanocaldococcus jannaschii</i> | WP_010869662.1   | WP_010870171.1 | MoaB              | MoeA     |
| <i>Neurospora crassa</i>             | XP_011394325.1   |                | NIT-9             |          |
| <i>Trichinella spiralis</i>          | XP_003379380.1   |                | Gephyrin          |          |
