# Supplementary material for: Convergent evolution links molybdenum insertase domains with organism-specific sequences
Source: PubMed Central journal article supplement (PMC11489736; doi:10.1038/s42003-024-07073-w), 2024-10-18
Supplement: 42003_2024_7073_MOESM2_ESM.pdf [file 42003_2024_7073_MOESM2_ESM.pdf]

## Description of Additional Supplementary Files

**File name:** Supplementary Data 1

**Description:** All numerical source data
